# Supplementary material
Source: MDPI journal article supplement (https://www.mdpi.com/2077-0472/13/9/1807)
Supplement: s1 [file s1]

**Table S1.** Basic Information of the Regional Trial in 2019 and 2020

| Test Units                                                         | Test Locations                                                               | Longitude | Latitude | Altitude (m) |
|--------------------------------------------------------------------|------------------------------------------------------------------------------|-----------|----------|--------------|
| College of Agriculture, Anhui Agricultural University              | Hefei City, Anhui Province                                                   | 117°27′   | 31°86′   | 35           |
| Wuhu Qingyi River Seed Industry Co., Ltd.                          | Yijiang Town, Nanling County, Anhui Province                                 | 118°27′   | 30°54′   | 12.2         |
| Huanggang City Agricultural Science Research Institute             | Meijiadun Farm, Huanggang City, Hubei Province                               | 114°05′   | 30°27′   | 31.2         |
| Jingzhou Academy of Agricultural Sciences                          | Wangjiaqiao, East Suburb of Shashi, Hubei Province                           | 112°02′   | 30°24′   | 32           |
| Hubei Hefu Agricultural Technology Co., Ltd.                       | Hongshan Village, Shihe Town, Tianmen City, Hubei Province                   | 113°01′   | 30°39′   | 37           |
| Zhenjiang Runjian Agricultural Technology Co., Ltd.                | Xingxiang Village, Baitu Town, Jurong City, Jiangsu Province                 | 119°17′   | 31°58′   | 9            |
| Crop Research Institute, Shanghai Academy of Agricultural Sciences | Fengxian District, Shanghai City                                             | 121°38′   | 30°88′   | 30           |
| Zhejiang Academy of Agricultural Sciences                          | Haining Experimental Base, Zhejiang Province                                 | 120°24′   | 30°26′   | 12           |
| Hangzhou Seed Group Co., Ltd.                                      | Yuhang Jingshan Experimental Base, Zhejiang Province                         | 119°90′   | 30°19′   | 20           |
| Zhejiang Kecheng Seed Industry Co., Ltd.                           | Wenzhou City Agricultural Science Institute Tengqiao Base, Zhejiang Province | 120°40′   | 28°01′   | 6            |

**Table S2.** Yield and Main Agronomic Economic Traits of Zheyongyou810 in Various Trial Sites in Regional Trials of 2019 and 2020

| Test Site                                                 | YEAR | Y (kg/hm <sup>2</sup> ) | CWCK      | GP (d)    | EP (10 <sup>4</sup> /hm <sup>2</sup> ) | PH (cm)    | PL (cm)   | NFGP       | SS (%)    | TGW (g)  |
|-----------------------------------------------------------|------|-------------------------|-----------|-----------|----------------------------------------|------------|-----------|------------|-----------|----------|
| Anhui Agricultural University<br>College of Agriculture   | 2019 | 9319.9±717.4            | 2.08±0.2  | 152.0±0.0 | 297.0±27.0                             | 129.3±0.6  | 21.5±0.3  | 206.7±18.9 | 84.5±1.4  | 25.3±0.2 |
|                                                           | 2020 | 11142.6±687.3           | 14.75±1.7 | 161.0±0.5 | 247.5±17.4                             | 127.3±1.0  | 20.7±0.5  | 250.4±17.4 | 70.3±1.3  | 24.0±0.1 |
| Hangzhou Seed Group Co., Ltd.                             | 2019 | 9810.0±733.2            | 15.14±1.6 | 159.0±0.0 | 153.0±13.2                             | 131.1±1.0  | 22.6±0.6  | 313.3±20.4 | 88.6 ±2.1 | 27.1±0.4 |
|                                                           | 2020 | 11606.6±504.3           | 12.75±2.5 | 160.0±0.6 | 220.5±21.9                             | 127.6±0.6  | 21.9±0.3  | 325.6±15.6 | 77.1±3.1  | 23.6±0.5 |
| Hubei Hefu Agricultural<br>Technology Co., Ltd            | 2019 | 9260.6±498.7            | 4.14±0.6  | 144.0±0.5 | 220.5±11.3                             | 132.7± 0.6 | 21.6±0.2  | 232.3±19.9 | 80.8 ±0.5 | 24.4±0.3 |
|                                                           | 2020 | 10447.4±567.8           | 9.71±2.3  | 153.0±0.0 | 220.5±14.5                             | 131.4±0.6  | 21.3±0.4  | 247.0±21.3 | 73.7±1.9  | 25.7±0.2 |
| Huanggang City Agricultural<br>Science Research Institute | 2019 | 11838.3±768.5           | 16.70±3.2 | 136.0±0.0 | 262.5±26.4                             | 120.5±1.0  | 21.5±0.9  | 263.3±18.5 | 83.4±1.2  | 26.4±0.5 |
|                                                           | 2020 | 11263.8±435.2           | 21.05±3.6 | 145.0±0.0 | 229.5±21.5                             | 120.2±0.6  | 22.6±0.8  | 214.6±22.1 | 91.0±2.1  | 24.1±0.6 |
| Jingzhou Academy of<br>Agricultural Sciences              | 2019 | 11652.5±654.3           | 17.97±4.2 | 146.0±0.5 | 207.0±16.7                             | 131.3±1.0  | 22.3±0.4  | 294.9±23.4 | 80.9±1.4  | 24.3±0.7 |
|                                                           | 2020 | 9830.1±457.8            | 4.68±0.8  | 151.0±0.0 | 214.5±23.6                             | 130.7±0.6  | 21.4±0.3  | 280.0±26.4 | 75.5±2.3  | 24.2±0.1 |
| Shanghai Academy of<br>Agricultural Sciences              | 2019 | 10116.5±721.9           | 0.93±0.2  | 161.0±0.5 | 285.0±28.4                             | 123.4±1.0  | 21.9±1.1  | 169.1±11.2 | 83.7±1.9  | 22.4±0.5 |
|                                                           | 2020 | 11992.4±622.4           | 10.30±4.3 | 160.0±0.0 | 315.0±25.5                             | 117.4±0.0  | 22.4±1.3  | 249.8±22.9 | 85.69±2.4 | 23.0±0.5 |
| Wuhu Qingyi River Seed<br>Industry Co., Ltd.              | 2019 | 9019.9±433.4            | 17.60±4.1 | 152.0±0.5 | 312.0±18.9                             | 117.2±0.6  | 20.7± 0.7 | 161.9±12.3 | 87.0±1.6  | 25.4±0.6 |
|                                                           | 2020 | 10159.9±568.9           | 14.71±2.2 | 158.0±0.0 | 276.0±16.8                             | 123.5±0.6  | 21.3± 0.8 | 254.8±27.8 | 67.2±1.7  | 24.6±0.7 |
| Zhejiang Kecheng Seed Industry<br>Co., Ltd.               | 2019 | 9139.9±453.2            | 4.76±1.1  | 137.0±0.6 | 228.0±23.5                             | 129.7±1.0  | 23.7±0.6  | 267.4±26.7 | 86.4±2.5  | 28.1±0.2 |
|                                                           | 2020 | 9480.0±345.8            | 6.41± 1.0 | 141.0±0.0 | 241.5±18.9                             | 125.6±0.6  | 21.7±0.5  | 279.0±28.6 | 83.2±3.1  | 23.6±0.3 |
| Zhejiang Academy of<br>Agricultural Sciences              | 2019 | 12112.5±567.4           | 31.30±4.5 | 158.0±0.5 | 192.0±34.3                             | 126.2±1.0  | 22.4±1.1  | 281.0±24.9 | 92.7±4.1  | 25.4±0.5 |
|                                                           | 2020 | 10219.9±983.2           | 16.64±3.4 | 158.0±0.0 | 180.0±11.9                             | 117.4±0.6  | 22.2±0.8  | 366.7±29.6 | 83.9±2.3  | 24.9±0.2 |
| Zhenjiang Runjian Agricultural<br>Technology Co., Ltd.    | 2019 | 12214.9±879.5           | 8.24 ±2.1 | 160.0±0.0 | 255.0±25.3                             | 125.7±1.0  | 22.5±0.7  | 259.2±18.4 | 83.8±1.4  | 25.3±0.4 |
|                                                           | 2020 | 11634.3±768.5           | 9.92±1.9  | 162.0±0.0 | 274.5±17.5                             | 123.3±0.6  | 24.0±0.6  | 245.2±17.2 | 85.7±3.1  | 22.4±0.2 |
| Average of 10 sites                                       | 2019 | 10697.8±1518.5          | 13.07±9.8 | 151.5±9.3 | 244.5±49.5                             | 126.6±5.1  | 22.1±0.8  | 244.8±51.4 | 85.1±3.6  | 25.3±1.6 |
|                                                           | 2020 | 10777.7±859.5           | 12.09±4.9 | 154.9±7.2 | 241.5±37.5                             | 124.4±4.3  | 21.9±1.8  | 215.0±40.9 | 79.31±7.7 | 24±0.9   |
| Mean                                                      |      | 10737.75±1189           | 12.58     | 153.2±8.3 | 243.0±87.0                             | 125.5±4.7  | 22.0±2.6  | 229.9±46.2 | 82.2±5.7  | 24.7±1.3 |

Note: Y, Yield; CWCK, Comparison with CK; GP, Growing Period; EP, Effective Panicles; PH, Plant Height; PL, Panicle Length; NFGP Number of Filled Grains per Panicle; SS, seed setting rate; TGW, Thousand Grain Weight.

**Table S3.** Yield, Growth Period, and Main Agronomic Economic Traits of Zheyongyou810 in Various Trial Sites in production trial of 2020

| Test Site                                                          | YP     | CWCK  | SD   | IHD  | MD    | GP  |
|--------------------------------------------------------------------|--------|-------|------|------|-------|-----|
| Crop Research Institute, Shanghai Academy of Agricultural Sciences | 830.88 | 16.24 | 5/17 | 9/1  | 10/29 | 165 |
| Wuhu Qingyi River Seed Industry Co., Ltd.                          | 654.80 | 13.96 | 5/25 | 9/4  | 10/19 | 147 |
| Jingzhou Academy of Agricultural Sciences                          | 748.80 | 9.60  | 6/4  | 9/8  | 10/26 | 144 |
| Zhejiang Academy of Agricultural Sciences                          | 844.40 | 13.65 | 5/25 | 9/6  | 10/21 | 149 |
| Zhenjiang Runjian Agricultural Technology Co., Ltd.                | 846.87 | 13.36 | 5/15 | 8/28 | 10/30 | 168 |
